# Supplementary material for: Development of an Optimized Process for Functional Recombinant SARS-CoV-2 Spike S1 Receptor-Binding Domain Protein Produced in the Baculovirus Expression Vector System
Source: MDPI journal article supplement (doi:10.3390/tropicalmed8110501), 2023-11-16
Supplement: s1 [file s1]

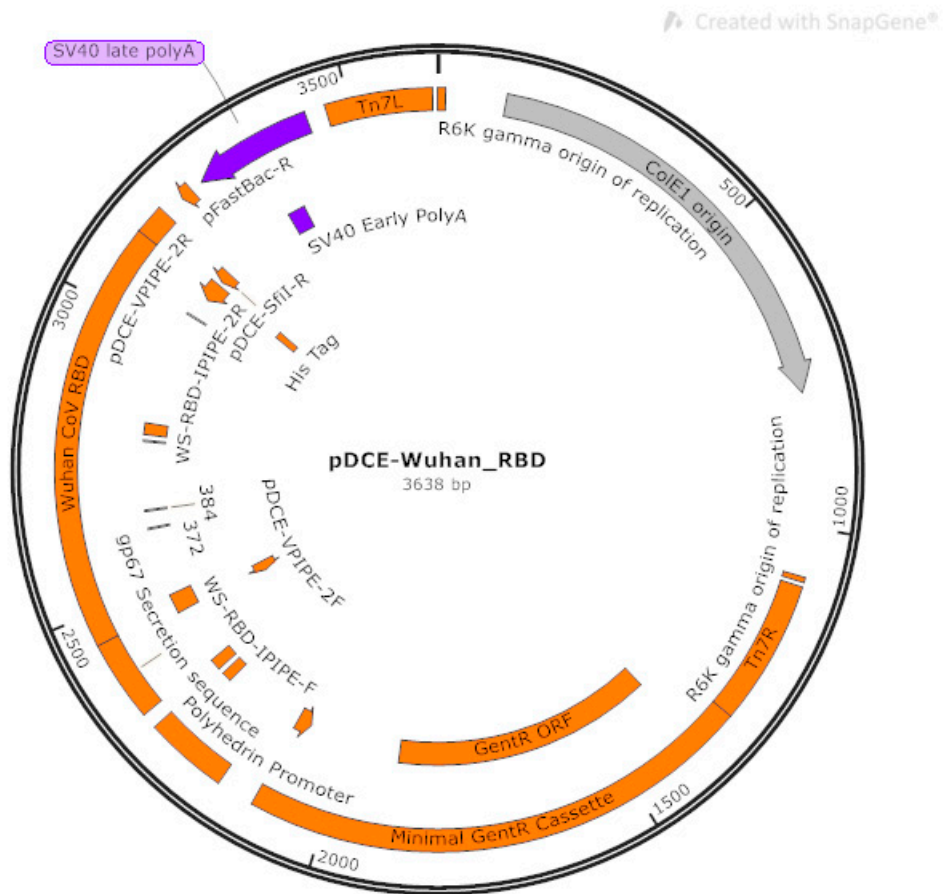

**Figure S1.** Map of the recombinant pFASTBac-S1RBD vector.

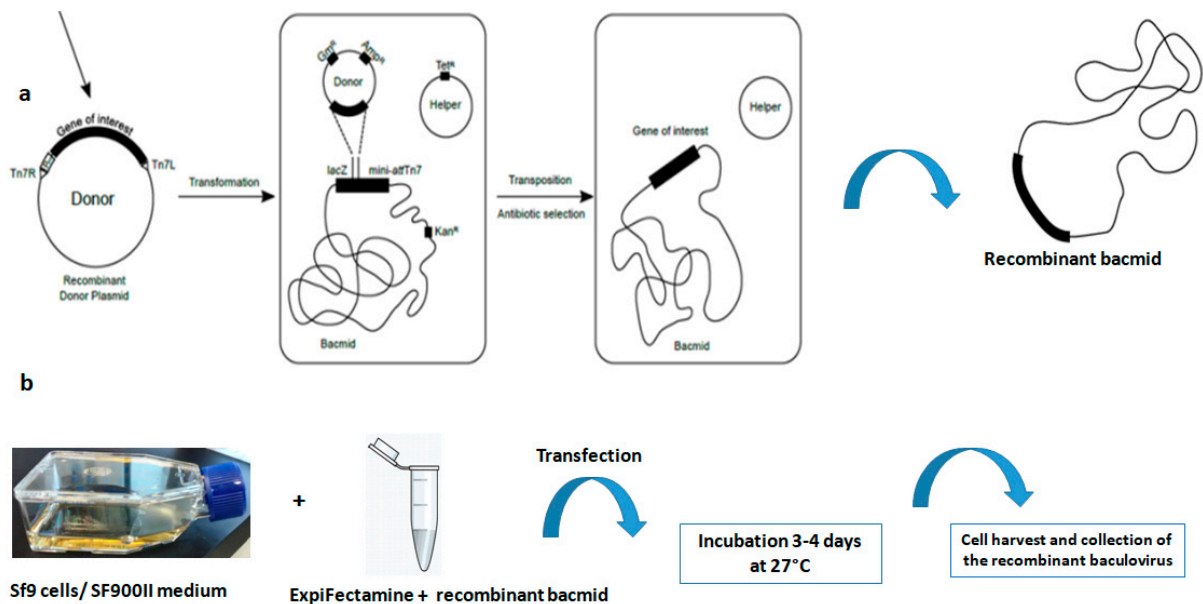

**Figure S2.** Schematic representation of the preparation of the recombinant bacmid (a) and transfection of Sf9 cells (b).

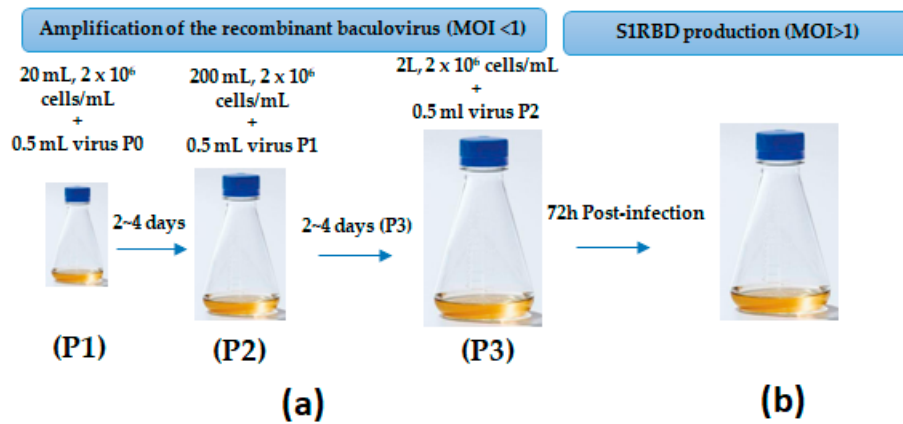

**Figure S3.** Schematic representation of the amplification process of recombinant baculovirus (a) and S1RBD protein (b).

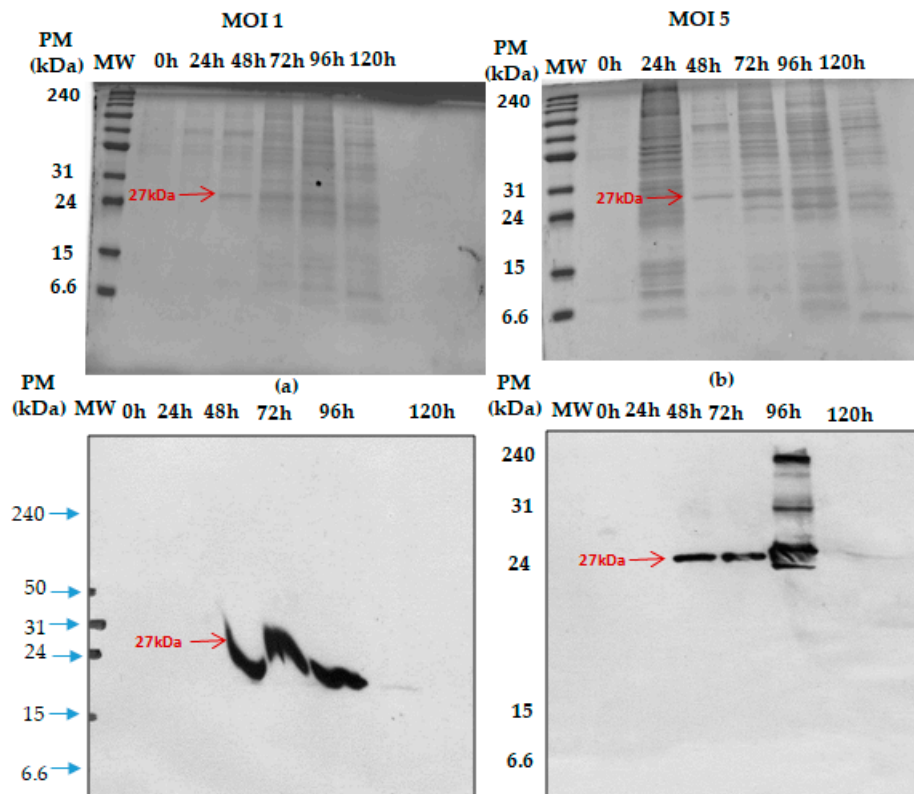

**Figure S4.** S1RBD expression in Sf9 cells. Total proteins from the culture supernatant were analysed at different time points post infection (tpi) with MOI 1 (a) and MOI 5 (b). The assays were analysed by Coomassie-stained SDS-PAGE 12% and Western blot. The cell density at infection was  $2 \times 10^6$  cells/mL in baffled shake-flask. Equal amounts of total proteins (10  $\mu$ g) were loaded onto the SDS-PAGE gel.

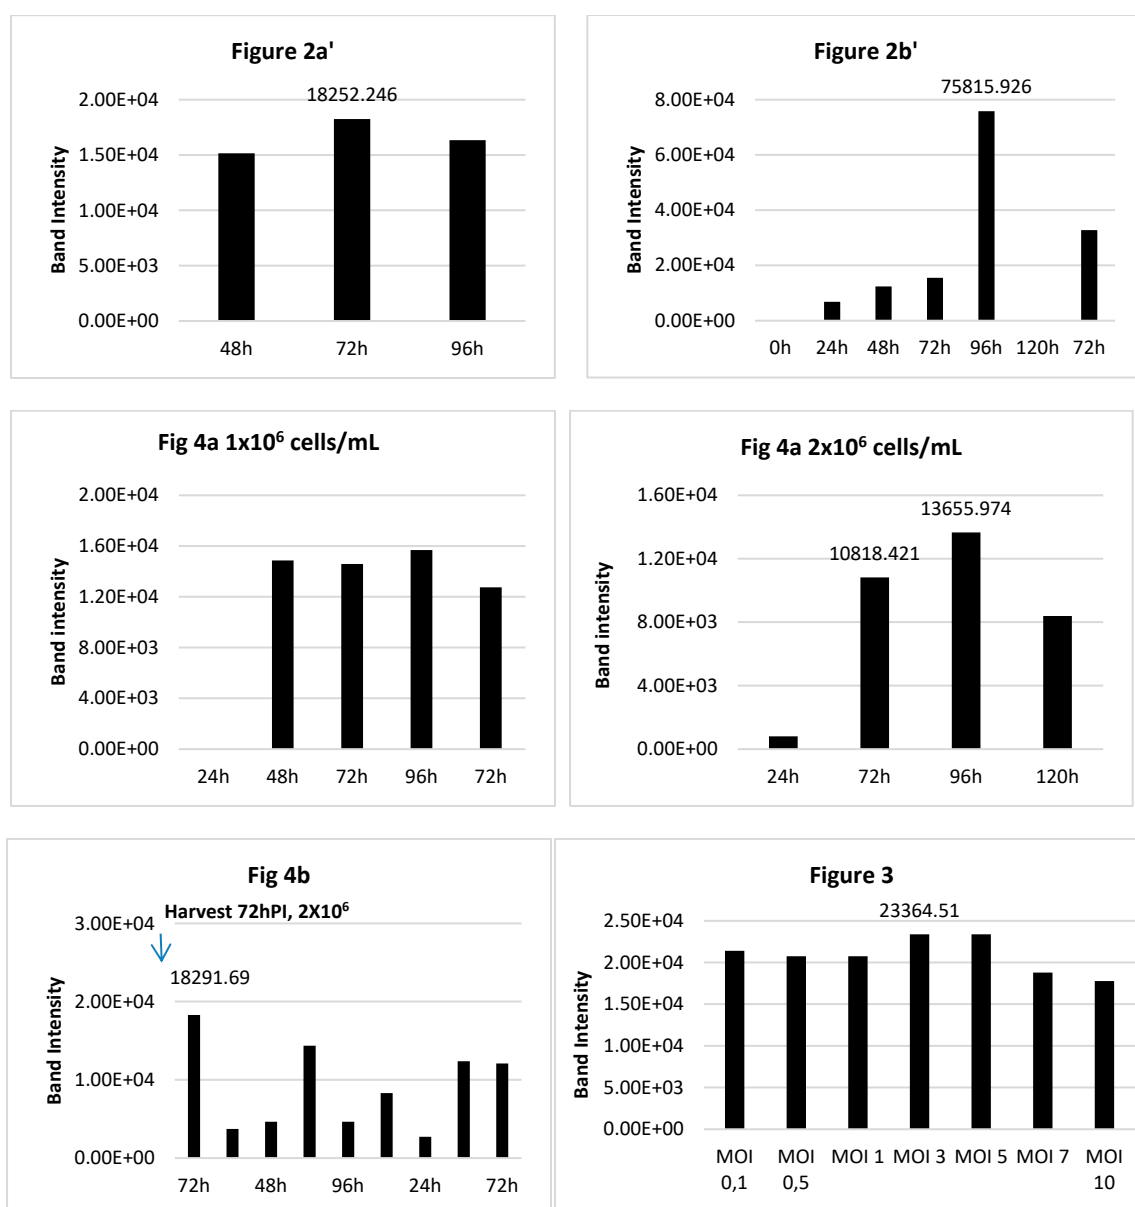

**Figure S5.** Examples of band density evaluation using the software “image J”

**Table S1.** Supplementary data related to downstream process

| Culture Conditions | Purification method                                  | Volume <sup>a</sup> (mL) | Total quantity of S1RBD (mg/L of crude supernatant) <sup>b</sup> |
|--------------------|------------------------------------------------------|--------------------------|------------------------------------------------------------------|
| Shake-flasks       | Ni-NTA affinity column<br>Followed by gel filtration | 150                      | 4.45±0.15                                                        |
|                    | Ni-NTA column + Superdex<br>increase column          | 30                       | 1.69±0.4                                                         |
| 7L-bioreactor      | NTA column Followed by gel<br>filtration             | 400                      | 70±8                                                             |

<sup>a</sup>Volume after buffer exchange and concentration (after TFF)

<sup>b</sup>The results are expressed as mean ± standard deviation (n = 3)
